# Supplementary material
Source: Springer Nature journal article supplement (https://www.springermedizin.de/resource/supplementary/12986_2010_294_MOESM3_ESM.pdf/25655778)

# LDL-particle size in normal and overweight Swiss Children (6-14 years old)

mean±SD

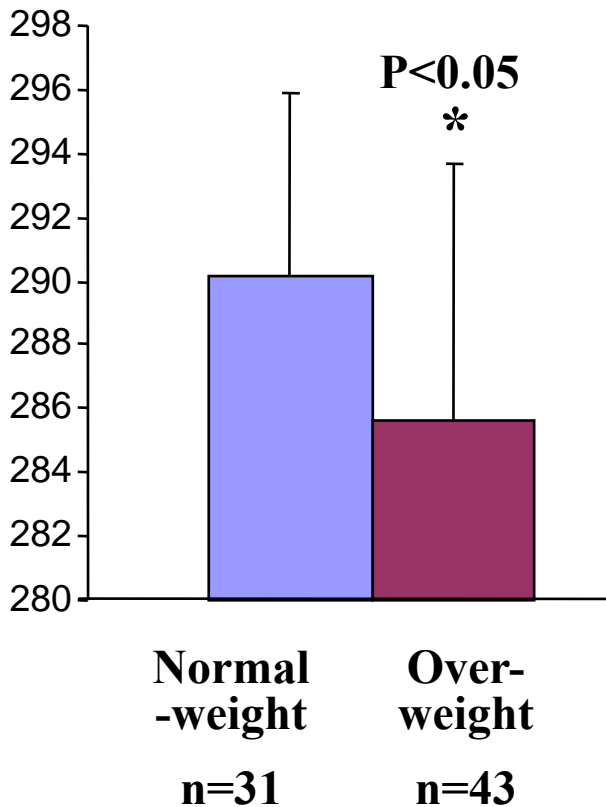

Supplement: MOESM3 [file 25655778]
